# Supplementary material for: Proteasome inhibitors bortezomib and carfilzomib used for the treatment of multiple myeloma do not inhibit the serine protease HtrA2/Omi
Source: PubMed Central journal article supplement — Toxicol Res (Camb). 2016 Aug 25;5(6):1619–28. doi: 10.1039/c6tx00220j (PMC6062231; doi:10.1039/c6tx00220j), 2016-08-25
Supplement: TX-005-C6TX00220J-s003.pdf [file TX-005-C6TX00220J-s003.pdf]

### Supplemental Figure 3

| Compound:   | IC <sub>50</sub> (μM) |         |         |
|-------------|-----------------------|---------|---------|
|             | HtrA2/Omi             |         |         |
|             | Average               | Assay 1 | Assay 2 |
| bortezomib  | >100                  | >100    | >100    |
| carfilzomib | >100                  | >100    | >100    |
| ixazomib    | >100                  | >100    | >100    |
| ucf-101     | 8.9                   | 13.1    | 4.6     |
