# Supplementary figures and images for: Proteasome inhibitors bortezomib and carfilzomib used for the treatment of multiple myeloma do not inhibit the serine protease HtrA2/Omi
Source: Royal Society of Chemistry journal article supplement (doi:10.1039/c6tx00220j), 2016-01-01

## Supplemental Figure 1

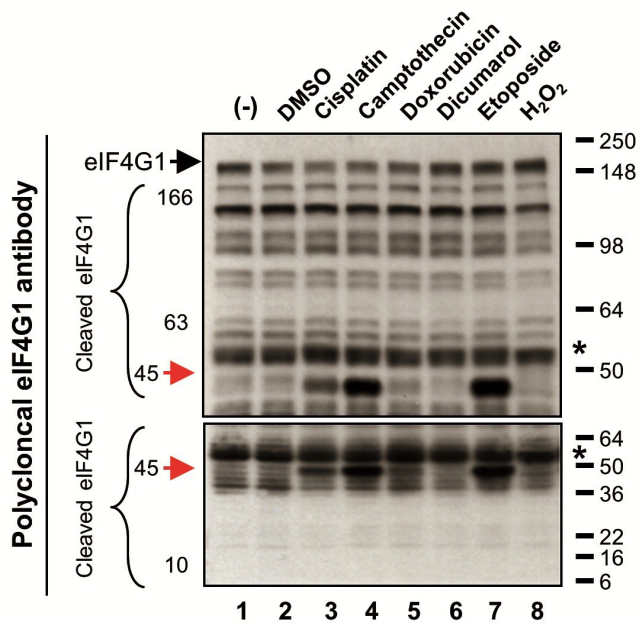

Supplement: c6tx00220j1.pdf [file c6tx00220j1.pdf]
