# Supplementary figures and images for: Proteasome inhibitors bortezomib and carfilzomib used for the treatment of multiple myeloma do not inhibit the serine protease HtrA2/Omi
Source: PubMed Central journal article supplement — Toxicol Res (Camb). 2016 Aug 25;5(6):1619–28. doi: 10.1039/c6tx00220j (PMC6062231; doi:10.1039/c6tx00220j), 2016-08-25

## Supplemental Figure 2

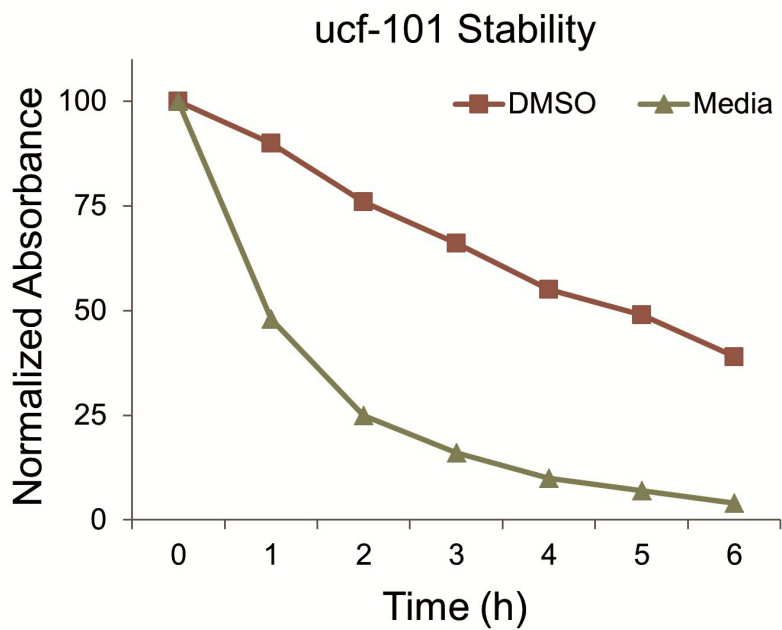

Supplement: TX-005-C6TX00220J-s002.pdf [file TX-005-C6TX00220J-s002.pdf]
